# Supplementary material for: Aquaporin ZmTIP2;3 Promotes Drought Resistance of Maize through Symbiosis with Arbuscular Mycorrhizal Fungi
Source: MDPI journal article supplement (doi:10.3390/ijms25084205), 2024-04-10
Supplement: s1 [file s1]

Supplementary data.

Table S1 Primers for qRT-PCR.

| Primer name             | Primer Sequence         | Primer name              | Primer Sequence         |
|-------------------------|-------------------------|--------------------------|-------------------------|
| <i>ZmTIP2;3</i> -qPCR-F | TCGCATTGGAAGCTTTCGC     | <i>ZmTIP2;3</i> -qPCR -R | CTTCGTC AATTGCGAGTAGGC  |
| <i>Zma-Tubulin</i> -F   | TCCTGGACAACGAGGCTATCTAT | <i>Zma-Tubulin</i> -R    | TGTGAGATCAGCCTGTTCAAGTT |
| <i>ZmGAPDH</i> -F       | AGCAGGTCGAGCATCTTCG     | <i>ZmGAPDH</i> -R        | CTGTAGCCCCACTCGTTGTC    |

Table S2 Primers for vector construction.

| Primer name              | Primer Sequence                                 | Primer name              | Primer Sequence                          |
|--------------------------|-------------------------------------------------|--------------------------|------------------------------------------|
| <i>ZmTIP2;3</i> -F       | ATGGTGAAGCTCGCATTGG                             | <i>ZmTIP2;3</i> -R       | CGAGTAGGCAATGGCGGA                       |
| <i>ZmTIP2;3</i> -GFP-F   | ggacagcccagatcaactagtATGGTGAAGCTCGCATTGG        | <i>ZmTIP2;3</i> -GFP-R   | gcccttgctcaccatggatccTGGGTACTCCTGCTGGCCG |
| p <i>ZmTIP2;3</i> -F     | CTACAACCGTACAGGCAAAAAGT                         | p <i>ZmTIP2;3</i> -R     | CTTTTTC CCCCCCTCTCC                      |
| p <i>ZmTIP2;3</i> -GUS-F | gacctgcaggcatgcaagcttCTACAACCGTACAGGCAAAAAGTATT | p <i>ZmTIP2;3</i> -GUS-R | ttaccctcagatctaccatggCTTTTTC CCCCCCTCTCC |

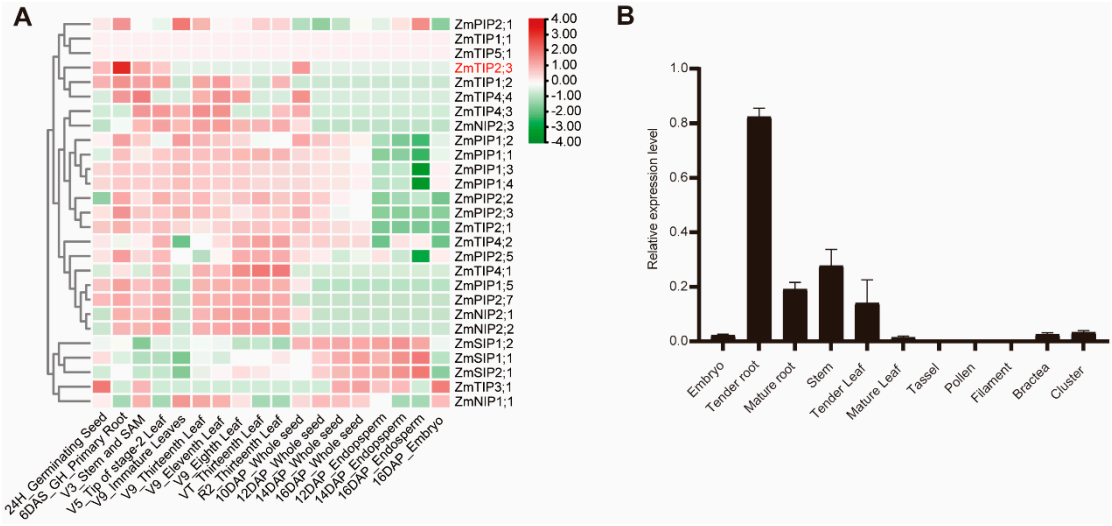

Figure S1. Tissue expression pattern analysis of *ZmTIP2;3*. (A) Heatmap of the tissue expression pattern of *ZmTIP2;3*. (B) The relative expression level of *ZmTIP2;3* in different tissues of maize was measured by qRT-PCR.
